# Supplementary material
Source: Springer Nature journal article supplement (https://hal.science/hal-01341266v1/file/12711_2013_2617_MOESM12_ESM.pdf)

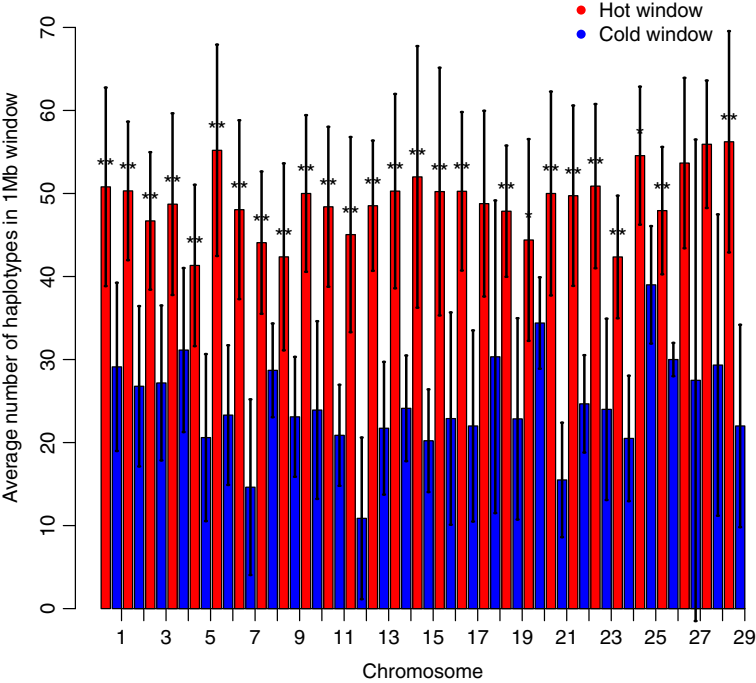

Supplement: MOESM12 [file 12711_2013_2617_MOESM12_ESM.pdf]
